# Supplementary material for: Patient-reported outcomes of rezvilutamide versus bicalutamide in combination with androgen deprivation therapy in high-volume metastatic hormone-sensitive prostate cancer patients (CHART): a randomized, phase 3 study
Source: PubMed Central journal article supplement (PMC11652652; doi:10.1038/s41392-024-02064-z), 2024-12-18
Supplement: 41392_2024_2064_MOESM3_ESM.pdf [file 41392_2024_2064_MOESM3_ESM.pdf]

# No.2550 -- 13Nov(1).docx

1 Article

2 **Patient-reported outcomes<sup>3</sup> of rezvilutamide versus bicalutamide in combination**  
3 **with androgen deprivation therapy in high-volume metastatic hormone-sensitive**  
4 **prostate cancer patients (CHART): a randomized, phase 3 study**

5 **Running title:** Rezvilutamide plus ADT in mHSPC

6

7 **Abstract**

8 <sup>4</sup> The randomized phase 3 CHART trial (NCT03520478) revealed that rezvilutamide  
9 (REZ) <sup>14</sup> plus androgen deprivation therapy (ADT) in high-volume, metastatic, hormone-  
10 sensitive prostate cancer (mHSPC) significantly enhanced <sup>3</sup> radiographic progression-  
11 free and overall survival than bicalutamide (Bic)-ADT. Accordingly, we examined  
12 <sup>42</sup> patient-reported outcomes (PROs) results, which were exploratory endpoints in the  
13 CHART trial. <sup>30</sup> The patients were randomly allocated to receive REZ-ADT or Bic-ADT  
14 in a 1:1 ratio. The PROs were evaluated with <sup>16</sup> the Brief Pain Inventory-Short Form (BPI-  
15 SF) and the Functional Assessment of Cancer Therapy-Prostate (FACT-P)  
16 questionnaires. Both study groups displayed comparable <sup>1</sup> baseline pain scores and  
17 functional status. Patients administered REZ-ADT had an extended <sup>13</sup> time to progression  
18 of worst pain intensity in comparison to those treated with Bic-ADT (<sup>2</sup> 25th percentile,  
19 <sup>8</sup> 9.2 [95% CI 7.4–16.6] vs. 6.4 months [95% CI 5.5–8.3]; HR 0.75 [95% CI 0.57–0.97];  
20  $p = 0.026$ ). Similarly, patients received REZ-ADT <sup>1</sup> exhibited a delayed time to  
21 progression of pain interference in comparison to those receiving Bic-ADT (<sup>1</sup> 25th  
22 percentile, 20.2 [95% CI 12.9–31.3] vs. 10.2 months [95% CI 7.4–11.1]; HR 0.70 [95%  
23 CI 0.52–0.93];  $p = 0.015$ ). Additionally, the REZ-ADT group demonstrated a prolonged  
24 delay in the deterioration of the total score on the FACT-P questionnaire (<sup>1</sup> 25th percentile,  
25 12.8 [95% CI 7.4–20.3] vs. 6.0 months [95% CI 4.6–9.2]; HR 0.66 [95% CI 0.50–0.86];  
26  $p = 0.002$ ), as well as most of the <sup>1</sup> FACT-P subscale scores, in comparison to the Bic-  
27 ADT group. In conclusion, REZ-ADT was superior to Bic-ADT regarding the pain  
28 alleviation and enhancement of functional scales for high-volume mHSPC.

29 **Keywords:** rezvilutamide plus ADT, metastatic hormone-sensitive prostate cancer,

30 patient-reported outcomes, pain, functional status

31

32 **Introduction**

33 Prostate cancer is among the prevailing reasons for cancer-linked morbidity and death  
34 in men worldwide, with its incidence rising as populations age.<sup>1</sup> Metastatic hormone-  
35 sensitive prostate cancer (mHSPC) is defined by a particularly aggressive disease type,  
36 where the tumor spreads beyond the prostate gland, commonly to the bones and lymph  
37 nodes, leading to challenging complications and reduced survival. Patients with  
38 mHSPC experience a high morbidity rate and poor clinical outcomes, and this disease  
39 severely impacts their quality of life (QoL), with common symptoms including bone  
40 pain, fatigue, urinary issues, and psychosocial distress.<sup>2</sup> This underscores the need for  
41 developing treatment approaches that not only effectively control disease progression  
42 but also enhance or maintain patient-reported outcomes (PROs) in this population.

43 The androgen receptor axis is crucial in prostate cancer pathology by driving tumor  
44 proliferation and growth.<sup>3,4</sup> While androgen-deprivation therapy (ADT), which reduces  
45 circulating testosterone levels, has been the cornerstone of treatment, single-agent ADT  
46 alone often fails to sustain long-term efficacy, as prostate cancer cells develop adaptive  
47 resistance to testosterone suppression. In recent years, the emergence of androgen  
48 receptor axis inhibitors, encompassing enzalutamide, abiraterone acetate, and  
49 apalutamide, has achieved a significant advancement in the therapeutic landscape for  
50 mHSPC. These agents, when used in combination with ADT, have demonstrated  
51 considerable survival benefits and have become integral to the standard of care for  
52 mHSPC patients.<sup>5-8</sup> The combination of androgen receptor axis inhibitors with  
53 ADT more effectively suppresses androgen receptor signaling than ADT alone, offering

54 new hope for delaying disease progression and improving survival outcomes in mHSPC  
55 patients.<sup>9</sup> For high-volume mHSPC patients who exhibit an extensive tumor burden  
56 with multiple metastatic sites, these new drugs have shown significant potential in  
57 clinical trials, resulting in <sup>32</sup> prolonged progression-free survival (PFS) and overall  
58 survival (OS) benefits. Notwithstanding these advancements, some patients experience  
59 resistance to existing androgen receptor-targeting therapies,<sup>9</sup> underscoring the need for  
60 novel agents that can further enhance clinical outcomes, especially for high-volume  
61 cases where the tumor burden is substantial and aggressive. Consequently, researchers  
62 have been investigating new-generation androgen receptor inhibitors that may  
63 overcome treatment resistance, improve efficacy, reduce toxicity, and maintain or  
64 enhance QoL, which are essential needs in managing the disease course of mHSPC  
65 patients.

66 Rezvilutamide (REZ) is a new orally administrated inhibitor of the androgen  
67 receptor that specifically targets the androgen receptor axis.<sup>10,11</sup> A preclinical study  
68 conducted in mice has indicated that REZ penetrates the blood-brain barrier to a  
69 significantly lesser extent compared to enzalutamide, potentially lowering the seizure  
70 risk. <sup>40</sup> In metastatic castration-resistant prostate cancer patients, clinical studies have  
71 demonstrated Rez's clinical effectiveness and favorable safety profile.<sup>12,13</sup> The CHART  
72 trial, a randomized <sup>11</sup> phase 3 study, was performed to ascertain the effectiveness and  
73 safety of REZ-ADT in high-volume <sup>46</sup> mHSPC patients compared to bicalutamide (Bic)-  
74 ADT. This study manifested that the REZ-ADT significantly enhanced <sup>39</sup> OS (Hazard  
75 ratio [HR] 0.58 with 95% confidence interval <sup>12</sup> [CI] 0.44–0.77; p < 0.0001) and

76 radiographic progression-free survival (rPFS; HR 0.44 [95% CI 0.33–0.58];  $p < 0.0001$ )  
77 in mHSPC patients when compared with Bic-ADT.<sup>10,14</sup> These outcomes resulted in the  
78 approval of REZ-ADT in China in 2022 for treating high-volume mHSPC.<sup>11</sup> The  
79 CHART trial results underscore the importance of incorporating novel androgen  
80 receptor-targeting agents into the treatment paradigm for metastatic prostate cancer,  
81 especially given the growing body of evidence that these therapies can enhance clinical  
82 outcomes and offer new hope for patients with poor prognosis.

83 In addition to improving clinical efficacy, PROs have emerged as critical endpoints  
84 in the evaluation of treatment approaches for mHSPC. Patients with mHSPC often  
85 endure not only the physical burden of the disease but also a spectrum of adverse effects  
86 from treatment, such as fatigue, hot flashes, loss of libido, and cognitive changes.<sup>15,16</sup>  
87 These side effects, combined with disease-related symptoms, can severely impact the  
88 QoL and mental well-being of patients.<sup>17</sup> Furthermore, mHSPC disproportionately  
89 affects older adults, who may have additional comorbidities that can exacerbate the  
90 impact of both disease symptoms and treatment toxicity. Traditional clinical study  
91 endpoints, such as OS and rPFS, while essential for assessing treatment efficacy, often  
92 fail to capture the daily QoL concerns of patients.<sup>18</sup> Moreover, PROs, which assess  
93 symptom burden, functional status, and overall satisfaction with therapy from the  
94 perspectives of patients, offer valuable insights into how treatments impact daily  
95 functioning and overall well-being, providing a more comprehensive view of  
96 therapeutic benefits.<sup>19,20</sup> Incorporating PROs into the study endpoints of clinical trials  
97 conducted in mHSPC patients allows for patient-centered evaluations and informs

98 decision-making by simultaneously considering efficacy, safety, and QoL, ultimately  
99 aiming to optimize comprehensive care and improve patient satisfaction.<sup>18</sup>

100 In the CHART trial, PROs were assessed as exploratory endpoints, focusing on  
101 pain control and functional assessments in mHSPC patients receiving either REZ-ADT  
102 or Bic-ADT. In this report, we present the comparative PRO <sup>41</sup>data from the CHART  
103 phase 3 trial, underscoring the importance of evaluating patient-centered outcomes  
104 alongside effectiveness and safety in treatment strategies for high-volume mHSPC.

105

## 106 **Results**

### 107 **Patients**

<sup>9</sup>  
108 Between June 28, 2018, and August 6, 2020, 654 patients fulfilling the eligibility  
109 criteria were recruited, with 326 and 328 patients allocated to the REZ-ADT and Bic-  
110 ADT groups, respectively. Baseline characteristics, including demographics, disease  
111 status, prior treatments, pain levels, and functional scores, were comparable across both  
112 treatment groups (Table 1).<sup>14</sup>

<sup>9</sup>  
113 This exploratory analysis of PROs had a median follow-up period of 29.3 months  
114 (interquartile range [IQR]: 21.0–33.3), with <sup>9</sup>a data cutoff date of February 28, 2022.

115 The PRO data beyond 44 treatment cycles were excluded because the Bic-ADT group  
116 had a limited number of remaining patients.



117 **5** **Brief Pain Inventory-Short Form (BPI-SF)**

118 Compliance rates for **BPI-SF** were high throughout the study, with over 90%  
119 compliance observed in both treatment groups up to week 161 (Supplementary Table  
120 1). Only 25 patients (3.8%) missed three or more scheduled pain assessments. Baseline  
121 assessments showed low pain levels across both groups, with 203 (62%) **15** in the **REZ-**  
122 **ADT group** and 206 (63%) **in the Bic-ADT group** reporting no pain at baseline, while  
123 17% and 15%, respectively, reported mild pain (Table 1). Notably, Asian patients  
124 generally reported lower baseline pain levels than non-Asian patients (Supplementary  
125 Table 2).

126 Patients treated with REZ-ADT demonstrated an extended **13** time to progression of  
127 worst **pain intensity**, in contrast to those receiving Bic-ADT (median: **7** NR [95% CI NR–  
128 NR] vs. NR [95% CI 20.3–NR]; **2** 25th percentile: 9.2 [95% CI 7.4–16.6] **8** vs. 6.4 months  
129 [95% CI 5.5–8.3]; HR 0.75 [95% CI 0.57–0.97]; p = 0.026, Fig. 1a). Similarly, the REZ-  
130 ADT group experienced an extended **24** time to progression in pain interference (median:  
131 **7** NR [95% CI NR–NR] vs. NR [95% CI NR–NR]; **1** 25th percentile: 20.2 [95% CI 12.9–  
132 31.3] vs. 10.2 months [95% CI 7.4–11.1]; HR 0.70 [95% CI 0.52–0.93]; p = 0.015, Fig.  
133 1b). Both groups did not achieve **37** the median time to average pain progression; the REZ-  
134 ADT group showed 25th percentile values of **1** 25.8 months (95% CI 14.8–31.4), while  
135 the Bic-ADT group indicated **1** 11.7 months (95% CI 8.7–22.1; HR 0.79 [95% CI 0.58–  
136 1.08]; p = 0.133; Fig. 1c).

137 Both therapy groups exhibited decreases **2** in worst pain intensity, interference, and

138 average pain over time, with more pronounced reductions found in the REZ-ADT group  
139 at various time intervals (Fig. 2). Analysis of the initial 12 treatment cycles stratified by  
140 baseline pain severity revealed that patients reporting moderate baseline pain showed  
141 marked improvements across pain metrics, with least-squares mean (LS Mean)  
142 reductions ranging from -1.96 to -3.26 for worst pain intensity, -0.54 to -1.78 for pain  
143 interference, and -1.00 to -1.97 for average pain in both groups. The REZ-ADT group  
144 frequently experienced a greater enhancement of pain relief than the Bic-ADT cohort  
145 (Supplementary Figs. 1–3). Meanwhile, patients with no or mild baseline pain  
146 maintained stable pain levels throughout the study.

147 Baseline assessments indicated higher PSA levels and a greater number of bone  
148 metastatic lesions among patients experiencing moderate to severe baseline pain  
149 compared to those with mild or no pain in both the REZ-ADT and Bic-ADT groups  
150 (Supplementary Table 3). Moreover, no obvious correlations were found between pain  
151 severity at baseline and the presence of visceral metastases. Across all baseline pain  
152 levels, the REZ-ADT combination consistently delayed PSA progression and prolonged  
153 rPFS and OS compared to Bic-ADT, with HRs < 1 across most efficacy outcomes,  
154 except for OS improvement in the subgroup with severe pain (Supplementary Table 4).  
155 This suggests a consistent therapeutic advantage of REZ-ADT, regardless of initial pain  
156 severity.

157 Additional analyses were conducted to examine the effectiveness of Rez-ADT  
158 compared to Bic-ADT in delaying the progression of worst pain intensity, interference,  
159 and average pain in Asian and non-Asian patient subgroups (Supplementary Table 5).

160 Due to a smaller sample size of non-Asian patients, findings for this subgroup should  
161 be interpreted with caution.

162 <sup>27</sup> **Functional Assessment of Cancer Therapy-Prostate (FACT-P)**

163 The overall compliance with the FACT-P questionnaire was strong, with adherence  
164 rates above 90% in both treatment groups through week 161 (Supplementary Table 1).  
165 Only 25 patients (3.8%) missed three or more scheduled functional assessments.  
166 Baseline FACT-P scores indicated that the functional status was similar between the  
167 REZ-ADT and Bic-ADT groups (Table 1).

168 For the FACT-P total score, REZ-ADT had longer 25th percentile time to functional  
169 deterioration (<sup>1</sup>12.8 months [95% CI 7.4–20.3] compared to 6.0 months [95% CI 4.6–  
170 9.2] with Bic-ADT; HR 0.66 [95% CI 0.50–0.86];  $p = 0.002$ ; Fig. 3a, Table 2).  
171 Deterioration across nearly all <sup>24</sup>FACT-P subscales was delayed with the administration  
172 of REZ-ADT, encompassing delayed deterioration in physical well-being (<sup>6</sup>HR 0.65, 95%  
173 CI 0.49–0.86;  $p = 0.003$ ), emotional well-being (HR 0.68, 95% CI 0.50–0.92;  $p = 0.013$ ),  
174 functional well-being (<sup>22</sup>HR 0.75, 95% CI 0.59–0.95;  $p = 0.015$ ), the FACT-G general  
175 scale (<sup>5</sup>HR 0.69, 95% CI 0.52–0.91;  $p = 0.008$ ), the prostate cancer subscale (<sup>5</sup>HR 0.74,  
176 95% CI 0.57–0.96;  $p = 0.022$ ), and the trial outcome index (HR 0.65, 95% CI 0.49–  
177 0.86;  $p = 0.002$ ; Table 2). Nonetheless, no difference was found <sup>11</sup>between the groups for  
178 the time to deterioration in social/family well-being or the FACT-P pain scale.

179 Both groups demonstrated improvements <sup>29</sup>from baseline in the FACT-P total score  
180 at all time points (LS Means of 0.66–6.77; Fig. 3b), with the REZ-ADT group showing

181 more pronounced improvements, reflected in between-group LS Mean differences of  
182 0.50–5.20. The score changes in all FACT-P subscales from baseline exhibited similar  
183 patterns in the improvement in both groups, along with between-group differences,  
184 except in the subscales of social/family well-being and the FACT-P pain scale.

185 An additional analysis evaluated the relationship between FACT-P total score  
186 changes over the initial 12 treatment cycles and baseline pain levels. Results suggested  
187 that patients with higher baseline pain reported greater improvements in the FACT-P  
188 total scale. While patients with low to no pain at baseline showed minor improvements,  
189 those with moderate baseline pain reported substantial improvements, with LS Mean  
190 scores of 0.92–12.16 overall assessment time points. This trend was more significant <sup>15</sup> in  
191 the REZ-ADT group, consistently exceeding improvements in the Bic-ADT group, with  
192 between-group LS Mean differences of 3.70–8.57 (Supplementary Fig. 4). The  
193 correlations between FACT-P subscale score improvements and baseline pain severity  
194 paralleled those observed in <sup>36</sup> the FACT-P total scale, except for the social/family well-  
195 being and FACT-P pain subscales.

## 196 Discussion

197 This exploratory <sup>4</sup> analysis of the phase 3 CHART study indicates that REZ-ADT  
198 outperformed Bic-<sup>4</sup>ADT in high-volume mHSPC patients in terms of delaying pain  
199 progression and enhancing functional health. Treatment with REZ-ADT demonstrated  
200 a delayed progression in worst pain intensity, pain interference, <sup>2</sup> and functional  
201 deterioration, as assessed by BPI-SF and FACT-P, respectively. The high patient

202 adherence observed for PRO measures supports the reliability of these assessments in  
203 capturing clinically relevant improvements with REZ-based therapy.

204 Pain management is fundamental in mHSPC care due to its direct impact on patient  
205 QoL.<sup>21,22</sup> Our findings suggest that the REZ-ADT group experienced a significant  
206 extension in time to pain progression—specifically, in terms of both worst pain and  
207 interference scores compared to the Bic-ADT group. However, differences in average  
208 pain progression time between groups were minimal. These results align with findings  
209 from the LATITUDE trial, which demonstrated that ADT-abiraterone acetate and  
210 prednisone delayed the progression of worst pain intensity and interference compared  
211 to ADT-placebos.<sup>23</sup> Conversely, the TITAN and ARCHES studies demonstrated no  
212 significant differences between apalutamide-ADT and placebo-ADT or enzalutamide-  
213 ADT and placebo-ADT regarding the time to progression of **worst pain intensity, pain**  
214 **interference, and average pain progression.**<sup>24,25</sup> Variations in trial design and patient  
215 features should be considered when comparing these results, underscoring the need for  
216 further studies on androgen receptor inhibitors combined with ADT to better understand  
217 their effects on pain progression.

218 The analysis of pain relief from baseline scores from **worst pain intensity** and  
219 **interference, and average pain** favored REZ-ADT at most assessed intervals, suggesting  
220 a stronger and more sustained pain-relief effect in this treatment group. Particularly,  
221 patients with greater initial pain severity exhibited more substantial improvements in  
222 pain-related measures when treated with REZ-ADT, indicating a potential predictive  
223 value of baseline pain levels for clinical response to this therapy. These findings are

224 consistent with data from the TITAN study, where apalutamide-ADT was also more  
225 effective in patients with higher baseline pain severity.<sup>24</sup>

226 Previous studies have shown that there can be variations in pain reporting across  
227 ethnic groups, potentially influenced by both cultural and biological factors. Consistent  
228 with earlier findings, our results indicated that Asian patients reported lower baseline  
229 pain levels,<sup>26</sup> possibly reflecting cultural tendencies such as stoicism, which may affect  
230 pain reporting. In contrast, studies suggested that Black men may report higher pain  
231 levels than Caucasians, possibly due to variations in pain tolerance, access to healthcare,  
232 and historical disparities in pain management for minority populations.<sup>26</sup> From a  
233 biological perspective, differences in androgen receptor gene polymorphisms, tumor  
234 pathobiology, and hormone metabolism have been observed across ethnic groups,<sup>26</sup>  
235 may also contribute to these observed differences in pain reporting both at baseline and  
236 during the androgen receptor inhibitor treatment. Although the CHART trial did not  
237 specifically address these factors, understanding these variations is essential for  
238 interpreting treatment outcomes in diverse patient groups. Future studies in more  
239 demographically varied populations, with subgroup analyses by ethnicity, would  
240 provide valuable perspectives into the effectiveness of REZ-ADT for managing pain in  
241 mHSPC across different backgrounds.

242 Our analysis using the FACT-P questionnaire revealed that patients treated with  
243 REZ-ADT experienced a longer time to functional deterioration across the total scale  
244 and more subscales than those in the Bic-ADT group, indicating a sustained  
245 preservation of functional well-being. This result suggests that REZ-ADT supports a

246 better QoL by delaying declines in overall functioning. Although prior studies have  
247 shown positive impacts of androgen receptor inhibitors combined with ADT on  
248 functional outcomes,<sup>23-25</sup> our findings add robust evidence to this growing body of  
249 research. However, differences between groups in social/family well-being and the  
250 FACT-P pain scale were not obvious, warranting further exploration to understand the  
251 underlying causes.

252 The trend of improvement in FACT-P scores from baseline across the total scale  
253 and nearly all subscales consistently favored REZ-ADT, underscoring its effectiveness  
254 in sustaining functional well-being in high-volume mHSPC patients. Correlation  
255 analyses showed that patients with higher baseline pain severity experienced the most  
256 notable improvements, suggesting that baseline characteristics like pain severity could  
257 guide more individualized treatment strategies.

258 The progression of pain, PSA progression, and survival outcomes relative to  
259 metastatic burden observed in the Bic arm were generally consistent with existing  
260 findings,<sup>14,27-32</sup> supporting the representativeness of this study population and the  
261 reliability of the findings. Although direct comparisons across studies should be  
262 interpreted cautiously, the data here suggest a distinct advantage in both efficacy and  
263 PROs for REZ over Bic when used with ADT in high-volume mHSPC. The observed  
264 improvement in survival and maintenance or enhancement of QoL in patients treated  
265 with REZ-ADT can likely be attributed to several potential mechanisms. The selective  
266 inhibition of REZ on androgen receptor pathways likely plays a central role by blocking  
267 cancer cell growth, reducing tumor burden, and delaying disease progression, especially

268 pronounced in bone metastases where pain and functional decline are common.<sup>14</sup>  
269 Additionally, REZ may help maintain physical mobility and reduce discomfort linked  
270 to bone metastasis by limiting osteoclast-mediated bone breakdown. This inhibition of  
271 bone resorption could alleviate complications and support mobility, addressing a  
272 significant QoL concern for high bone metastatic burden patients.<sup>33,34</sup> Another possible  
273 mechanism involves the influence of REZ on molecules associated with pain, such as  
274 nerve growth factor and inflammatory cytokines at metastatic sites,<sup>35</sup> which could lead  
275 to pain reduction. Moreover, its regulatory impact on the hypothalamic-pituitary-  
276 adrenal axis,<sup>36,37</sup> may reduce stress hormone levels, such as cortisol, contributing to  
277 improved mental well-being and, in turn, better physical functioning. Altogether, these  
278 mechanisms underscore that the survival benefits of REZ-ADT do not come at the  
279 expense of QoL; instead, they may enhance it. These insights enable clinicians to have  
280 more comprehensive discussions with patients, offering a treatment choice that  
281 prioritizes both extended survival and sustained QoL.

282       Herein, there are several limitations. The current follow-up duration of 29.3 months  
283 may not fully capture the entire spectrum of PROs, particularly in the REZ-ADT group,  
284 which exhibited superior anti-tumor efficacy and a more favorable PRO profile  
285 compared to the Bic-ADT group, with a substantial proportion of patients still receiving  
286 treatment. Therefore, an extended follow-up period will be crucial for assessing the  
287 long-term durability of these findings. Additionally, since most participants were Asian,  
288 the applicability of our study to broader, ethnically diverse populations might be limited.  
289 Future studies and meta-analyses incorporating global data can help assess the



290 consistency of these results across different demographics, enhancing our  
291 understanding of the broader applicability of REZ-ADT for high-volume mHSPC  
292 patients worldwide.

293 To conclude, the CHART study establishes the benefits of REZ over Bic when  
294 combined with ADT for managing pain and maintaining functional status in high-  
295 volume mHSPC. Together with its demonstrated anti-tumor efficacy and safety, these  
296 findings reinforce REZ-ADT as a promising treatment option and a potential new  
297 standard of therapy for these patients.

## 298 **Methods**

### 299 **Study Design and Patient Population**

300 In <sup>9</sup> 72 hospitals across China, Poland, the Czech Republic, and Bulgaria, <sup>4</sup> a multinational,  
301 randomized, open-label, active-controlled phase 3 CHART study (NCT03520478) was  
302 performed. Eligibility criteria <sup>3</sup> were men aged 18 years or above, having histologically  
303 or cytologically verified high-volume prostate adenocarcinoma. High-volume  
304 disease was characterized by the existence of <sup>4</sup> four or more bone lesions identified using  
305 a [<sup>99</sup>Tc] bone scan, with a minimum of one lesion situated outside the pelvis or  
306 vertebral column or by the presence of visceral metastases (excluding lymph node  
307 involvement) verified via <sup>7</sup> CT or MRI. Eligible patients needed to have an Eastern  
308 Cooperative Oncology Group (ECOG) performance status of 0 or 1 and sufficient organ  
309 function. Prior treatment with ADT was permitted if administered no more than three  
310 months before study entry, provided there was no evidence of significant radiographic

311 or clinical progression of prostate-specific antigen levels. Patients exhibiting  
312 neuroendocrine differentiation or small-cell characteristics, or those with a history of  
313 chemotherapy or localized treatment, were excluded. Nevertheless, patients who had  
314 received a single course of palliative radiotherapy, transurethral resection of the prostate,  
315 or surgical interventions for metastatic symptoms were eligible, provided these  
316 interventions were completed at least four weeks prior to treatment initiation and all  
317 treatment-related adverse events resolved to grade 1 or 0, as per the Common  
318 Terminology Criteria for Adverse Events version 4.03.

319 The study protocol and its amendments were approved by independent ethics  
320 review committee at each involved site. The trial adhered to the Declaration of Helsinki  
321 and the International Council for Harmonization Good Clinical Practice guidelines. All  
322 participants provided informed consent.

323

### 324 **Treatment and Assessments**

325 Eligible patients were randomly allocated to receive ADT (utilizing a luteinizing  
326 hormone-releasing hormone agonist or antagonist or bilateral orchiectomy) combined  
327 with either REZ (240 mg) or Bic (50 mg) in a 1:1 ratio, received orally once daily in  
328 28-day therapy cycles. Randomization was stratified according to ECOG performance  
329 status (0 or 1) and the existence of visceral metastases (yes or no). Treatment continued  
330 until disease progression, unacceptable toxicity, withdrawal of consent, or decision by  
331 the investigator. Dose interruptions and reductions for REZ were allowed, but dose

332 interruptions for Bic were allowed to manage toxicity, but dose reductions were not  
333 permitted. Pain management was guided by the World Health Organization's analgesic  
334 ladder and local pain management protocols in China.<sup>38-41</sup>

335 The PROs were evaluated with BPI-SF and the FACT-P version 4 questionnaires.  
336 The BPI-SF has 15 items that evaluate two main domains: pain severity and pain  
337 interference.<sup>42,43</sup> Pain severity and its effect on everyday activities were rated on a scale  
338 from 0 to 10, with 0 denoting "no pain" or "no interference" and 10 signifying "the  
339 worst imaginable pain" or "complete interference." Higher scores indicate worse pain  
340 experiences. The FACT-P questionnaire encompasses domains of physical, social,  
341 family, emotional, and functional well-being, and a prostate cancer-specific domain. It  
342 comprises the total FACT-P scale (0–156), the FACT-P subscale for general functional  
343 status (FACT-G, which includes physical, social and family, emotional, and functional  
344 well-being; 0–108), and the trial outcome index (which includes physical and functional  
345 well-being, and the prostate cancer-specific domain), with higher scores reflecting  
346 better outcomes.<sup>44-46</sup> At baseline, the questionnaires were administered, as well as at the  
347 commencement of each cycle from cycles 2 to 12, bi-cyclically during cycles 13 to 36,  
348 and every four cycles afterward, continuing until 30 days following the last treatment.  
349 Patient-reported data were not collected throughout long-term survival follow-ups.

## 350 **Outcomes**

351 The co-primary endpoints of the CHART trial encompassed independent review  
352 committee-evaluated rPFS and OS, with data previously published. PROs were

353 exploratory endpoints evaluated using the BPI-SF and the FACT-P (version 4).

354 The time to the worst pain intensity progression was defined as the interval from  
355 randomization to the first occurrence of a 2-point or greater rise in pain intensity, as  
356 assessed by item 3 of the BPI-SF. The time to pain interference progression was  
357 calculated as the period from randomization to the first occurrence of an increase of at  
358 least half a standard deviation from baseline scores on the combined scale of items 9A-  
359 G of the BPI-SF. The time to average pain progression was defined as the period from  
360 randomization to the first reported rise of 2 points or more in average pain compared to  
361 baseline, determined by the average of items 3-6 of the BPI-SF. Deterioration thresholds  
362 for the FACT-G general scale, trial outcome index, FACT-P total scale, and FACT-P  
363 pain scale were established at 9 points, 9 points, 10 points, and 2 points, respectively;  
364 for other FACT-P scales; the threshold for deterioration was set at 3 points.  
365 Confirmatory evaluations for these progressions were required at subsequent  
366 assessments conducted at least four weeks later. In cases where the last assessment  
367 indicated progression but there was no confirmed progression, the last assessment was  
368 treated as an event.

### 369 **Statistical Analyses**

370 Details regarding sample size assumptions have been previously reported. PROs were  
371 analyzed the intent-to-treat population, including all randomized patients.

372 Compliance, BPI-SF scale scores, and FACT-P scale scores were summarized  
373 descriptively. The Kaplan-Meier methodology was employed to calculate the median

374 time to deterioration for each therapy group, with <sup>17</sup> 95% CIs for median values estimated  
375 with the Brookmeyer-Crowley method. Between-group differences in time-to-event  
376 parameters were analyzed utilizing a <sup>19</sup> stratified log-rank test. A stratified Cox  
377 proportional hazards model was employed to derive the HR and their corresponding 95%  
378 CIs. In cases where median values could not be ascertained, comparisons were made  
379 using the 25th percentiles. The censoring date for time to PRO progression or  
380 deterioration <sup>23</sup> of the BPI-SF and FACT-P was defined as the date of the last BPI-SF  
381 assessment if no pain progression was noted or the date of randomization if there was  
382 no baseline or post-baseline disease assessment.

383 Alterations from baseline in <sup>10</sup> the BPI-SF and FACT-P scales <sup>18</sup> were analyzed  
384 employing a linear Mixed Model Repeated Measures model approach, employing  
385 Restricted Maximum Likelihood estimation. The model incorporated the baseline  
386 values, treatment groups, stratification factors, visits, and treatment-by-visit  
387 interactions, treating patients as random impacts. An unstructured covariance matrix  
388 was utilized, with a fallback to compound symmetry covariance structures if  
389 convergence issues arose. The Kenward-Roger approximation was employed to  
390 investigate the freedom degrees. The LS Mean and the differences between groups in  
391 LS Means, along with their corresponding 95% CIs, were calculated. The model  
392 included visits with at least 30 non-missing values in each treatment group. <sup>31</sup> All  
393 statistical analyses were conducted utilizing SAS software (v. 9.4).

394 **Data availability**

395 Available upon a reasonable request from the corresponding author.

396 **Acknowledgments**

397 We extend our appreciation to <sup>4</sup> the patients, their families, the investigators, the site  
398 workers, and the trial teams. Medical writing support was offered by Tengfei Zhang  
399 (PhD, medical writer at Jiangsu Hengrui Pharmaceuticals Co., Ltd) in accordance with  
400 Good Publication Practice Guidelines.

401 **Author contributions**

402 HW, DY, JL, and WW performed the conception and design <sup>10</sup> of the study. All authors  
403 participated in the data collection. XY conducted <sup>25</sup> the statistical analysis. All authors  
404 performed data interpretation and manuscript writing and reviewed and approved the  
405 submission.

406 **Competing interests**

407 XY, JL, and WW <sup>20</sup> are employees of Jiangsu Hengrui Pharmaceuticals Co., Ltd. The  
408 remaining co-authors declare no competing interests.

409 **Funding**

410 <sup>4</sup> Funded by Jiangsu Hengrui Pharmaceuticals Co., Ltd.

411

412 <sup>33</sup>  
**Figure legends**

413 **Figure 1. Kaplan-Meier curves for time to pain progression assessed by BPI-SF**

414 <sup>2</sup> (a) time to worst pain progression. (b) time to pain interference progression. (c) <sup>45</sup> time to  
415 average pain progression.

416 <sup>12</sup>  
**Figure 2. Changes in pain from baseline assessed by BPI-SF**

417 <sup>43</sup> (a) Worst pain in past 24 hours. (b) Pain interference. (c) Average pain.

418 **Figure 3. FACT-P total score**

419 <sup>2</sup> (a) Kaplan-Meier curve for time to functional status deterioration assessed by FACT-P  
420 total score. (b) <sup>5</sup> Change from baseline in FACT-P total score.

421

422

423

424

425

426

427

428

429

430

431

432

433 References

434 1 Bray, F. et al. Global cancer statistics 2022: GLOBOCAN estimates of incidence  
435 and mortality worldwide for 36 cancers in 185 countries. *CA Cancer J Clin.* 74, 229-  
436 263 (2024).

437 2 Sandhu, S. et al. Prostate cancer. *Lancet.* 398, 1075-1090 (2021).

438 3 Dai, C., Dehm, S. M. & Sharifi, N. Targeting the Androgen Signaling Axis in  
439 Prostate Cancer. *J Clin Oncol.* 41, 4267-4278 (2023).

440 4 Dai, C., Heemers, H. & Sharifi, N. Androgen Signaling in Prostate Cancer. *Cold*  
441 *Spring Harb Perspect Med.* 7 (2017).

442 5 Fizazi, K. et al. Abiraterone plus prednisone in metastatic, castration-sensitive  
443 prostate cancer. *N Eng J Med.* 377, 352-360 (2017).

444 6 Chi, K. N. et al. Apalutamide for metastatic, castration-sensitive prostate cancer. *N*  
445 *Eng J Med.* 381, 13-24 (2019).

446 7 Davis, I. D. et al. Enzalutamide with standard first-line therapy in metastatic  
447 prostate cancer. *N Eng J Med.* 381, 121-131 (2019).

448 8 Armstrong, A. J. et al. ARCHES: a randomized, phase III study of androgen  
449 deprivation therapy with enzalutamide or placebo in men with metastatic hormone-  
450 sensitive prostate cancer. *J Clin Oncol.* 37, 2974-2986 (2019).

451 9 Hussain, M. et al. Metastatic Hormone-Sensitive Prostate Cancer and Combination  
452 Treatment Outcomes: A Review. *JAMA Oncol.* 10, 807-820 (2024).



- 453 10 Singh, K. et al. Rezvilutamide for metastatic hormone-sensitive prostate cancer.  
454 *Lancet Oncol.* 23, e490 (2022).
- 455 11 Keam, S. J. Rezvilutamide: First Approval. *Drugs.* 83, 189-193 (2023).
- 456 12 Qin, X. et al. Activity and safety of SHR3680, a novel antiandrogen, in patients  
457 with metastatic castration-resistant prostate cancer: a phase I/II trial. *BMC Med.* 20, 84  
458 (2022).
- 459 13 Qin, X. et al. SHR3680, a novel antiandrogen, for the treatment of metastatic  
460 castration-resistant prostate cancer (mCRPC): A phase I/II study. *Journal of Clinical*  
461 *Oncology.* 38, 90-90 (2020).
- 462 14 Gu, W. et al. Rezvilutamide versus bicalutamide in combination with androgen-  
463 deprivation therapy in patients with high-volume, metastatic, hormone-sensitive  
464 prostate cancer (CHART): a randomised, open-label, phase 3 trial. *Lancet Oncol.* 23,  
465 1249-1260 (2022).
- 466 15 Penson, D. F. & Litwin, M. S. The physical burden of prostate cancer. *Urol Clin*  
467 *North Am.* 30, 305-313 (2003).
- 468 16 Baden, M. et al. Pain, fatigue and depression symptom cluster in survivors of  
469 prostate cancer. *Support Care Cancer.* 28, 4813-4824 (2020).
- 470 17 Rhee, H. et al. Adverse effects of androgen-deprivation therapy in prostate cancer  
471 and their management. *BJU Int.* 115 Suppl 5, 3-13 (2015).
- 472 18 Efficace, F. et al. Overcoming barriers to the implementation of patient-reported  
473 outcomes in cancer clinical trials: the PROMOTION Registry. *Health Qual Life*  
474 *Outcomes.* 12, 86 (2014).

- 475 19 Nipp, R. D. et al. The relationship between physical and psychological symptoms  
476 and health care utilization in hospitalized patients with advanced cancer. *Cancer*. 123,  
477 4720-4727 (2017).
- 478 20 Basch, E. et al. Symptom Monitoring With Patient-Reported Outcomes During  
479 Routine Cancer Treatment: A Randomized Controlled Trial. *J Clin Oncol*. 34, 557-565  
480 (2016).
- 481 21 Bader, P. et al. Prostate cancer pain management: EAU guidelines on pain  
482 management. *World J Urol*. 30, 677-686 (2012).
- 483 22 Thompson, J. C., Wood, J. & Feuer, D. Prostate cancer: palliative care and pain  
484 relief. *Br Med Bull*. 83, 341-354 (2007).
- 485 23 Chi, K. N. et al. Patient-reported outcomes following abiraterone acetate plus  
486 prednisone added to androgen deprivation therapy in patients with newly diagnosed  
487 metastatic castration-naive prostate cancer (LATITUDE): an international, randomised  
488 phase 3 trial. *Lancet Oncol*. 19, 194-206 (2018).
- 489 24 Agarwal, N. et al. Health-related quality of life after apalutamide treatment in  
490 patients with metastatic castration-sensitive prostate cancer (TITAN): a randomised,  
491 placebo-controlled, phase 3 study. *Lancet Oncol*. 20, 1518-1530 (2019).
- 492 25 Stenzl, A. et al. Effect of Enzalutamide plus Androgen Deprivation Therapy on  
493 Health-related Quality of Life in Patients with Metastatic Hormone-sensitive Prostate  
494 Cancer: An Analysis of the ARCHES Randomised, Placebo-controlled, Phase 3 Study.  
495 *Eur Urol*. 78, 603-614 (2020).
- 496 26 Anderson, K. O., Green, C. R. & Payne, R. Racial and ethnic disparities in pain:

497 causes and consequences of unequal care. *J Pain*. 10, 1187-1204 (2009).

498 27 Akaza, H. et al. Combined androgen blockade with bicalutamide for advanced  
499 prostate cancer: long-term follow-up of a phase 3, double-blind, randomized study for  
500 survival. *Cancer*. 115, 3437-3445 (2009).

501 28 Davis, I. D. et al. Enzalutamide with Standard First-Line Therapy in Metastatic  
502 Prostate Cancer. *N Engl J Med*. 381, 121-131 (2019).

503 29 Shore, N. D. et al. Efficacy and safety of enzalutamide versus bicalutamide for  
504 patients with metastatic prostate cancer (TERRAIN): a randomised, double-blind,  
505 phase 2 study. *Lancet Oncol*. 17, 153-163 (2016).

506 30 Vaishampayan, U. N. et al. Clinical Efficacy of Enzalutamide vs Bicalutamide  
507 Combined With Androgen Deprivation Therapy in Men With Metastatic Hormone-  
508 Sensitive Prostate Cancer: A Randomized Clinical Trial. *JAMA Netw Open*. 4,  
509 e2034633 (2021).

510 31 Penson, D. F. et al. Enzalutamide Versus Bicalutamide in Castration-Resistant  
511 Prostate Cancer: The STRIVE Trial. *J Clin Oncol*. 34, 2098-2106 (2016).

512 32 Ueda, T. et al. Abiraterone acetate versus bicalutamide in combination with  
513 gonadotropin releasing hormone antagonist therapy for high risk metastatic hormone  
514 sensitive prostate cancer. *Sci Rep*. 11, 10094 (2021).

515 33 Logothetis, C. J. & Lin, S. H. Osteoblasts in prostate cancer metastasis to bone. *Nat*  
516 *Rev Cancer*. 5, 21-28 (2005).

517 34 Roodman, G. D. Mechanisms of bone metastasis. *N Engl J Med*. 350, 1655-1664  
518 (2004).

519 35 Di Donato, M. et al. Cross-talk between androgen receptor and nerve growth factor  
520 receptor in prostate cancer cells: implications for a new therapeutic approach. *Cell*  
521 *Death Discov.* 4, 5 (2018).

522 36 Kiezun, J., Kaminska, B., Jankowski, J. & Dusza, L. Concentrations of the  
523 adrenocorticotrophic hormone, corticosterone and sex steroid hormones and the  
524 expression of the androgen receptor in the pituitary and adrenal glands of male turkeys  
525 (*Meleagris gallopavo*) during growth and development. *Gen Comp Endocrinol.* 217-  
526 218, 62-70 (2015).

527 37 Zuloaga, D. G., Lafrican, J. J. & Zuloaga, K. L. Androgen regulation of behavioral  
528 stress responses and the hypothalamic-pituitary-adrenal axis. *Horm Behav.* 162, 105528  
529 (2024).

530 38 Anekar, A. A., Hendrix, J. M. & Cascella, M. in *StatPearls* (2024).

531 39 Mestdagh, F., Steyaert, A. & Lavand'homme, P. Cancer Pain Management: A  
532 Narrative Review of Current Concepts, Strategies, and Techniques. *Curr Oncol.* 30,  
533 6838-6858 (2023).

534 40 National Health Commission of China. Cancer Pain Treatment Guidelines (2018  
535 Edition). Aug 27, 2018. [https://www.gov.cn/xinwen/2018-](https://www.gov.cn/xinwen/2018-10/02/5327533/files/76920913ea5f4149b064984fe63636ac.docx)  
536 [10/02/5327533/files/76920913ea5f4149b064984fe63636ac.docx](https://www.gov.cn/xinwen/2018-10/02/5327533/files/76920913ea5f4149b064984fe63636ac.docx) (Accessed Sep 10,  
537 2024).

538 41 Chinese Medical Doctor Association Pain Management Subcommittee. Chinese  
539 Expert Consensus on Cancer-Related Pain Assessment (2023 Edition). Dec 15, 2023.  
540 [http://casp.ijournals.cn/ch/reader/download\\_pdf.aspx?file\\_no=231201&year\\_id=2023](http://casp.ijournals.cn/ch/reader/download_pdf.aspx?file_no=231201&year_id=2023)

541 &quarter\_id=12&flag=1 (Accessed Sep 10, 2024).

542 42 Cleeland CS. Brief Pain Inventory (Short Form). National Palliative Care Research  
543 Center. 1991. [http://www.npcrc.org/files/news/briefpain\\_short.pdf](http://www.npcrc.org/files/news/briefpain_short.pdf) (accessed Jan 24,  
544 2024).

545 43 Cleeland, C. S. & Ryan, K. M. Pain assessment: global use of the Brief Pain  
546 Inventory. *Ann Acad Med Singap.* 23, 129-138 (1994).

547 44 FACIT. Functional Assessment of Cancer Therapy-Prostate (version 4). Nov 19,  
548 2007.

549 [https://www.facit.org/\\_files/ugd/626819\\_bcdd612dbf734297a32172aa2873d7f4.pdf](https://www.facit.org/_files/ugd/626819_bcdd612dbf734297a32172aa2873d7f4.pdf)  
550 (accessed Jan 24, 2024).

551 45 Cella, D. et al. Estimating clinically meaningful changes for the Functional  
552 Assessment of Cancer Therapy--Prostate: results from a clinical trial of patients with  
553 metastatic hormone-refractory prostate cancer. *Value Health.* 12, 124-129 (2009).

554 46 Esper, P. et al. Measuring quality of life in men with prostate cancer using the  
555 functional assessment of cancer therapy-prostate instrument. *Urology.* 50, 920-928  
556 (1997).

557

558

23%

SIMILARITY INDEX

---

PRIMARY SOURCES

---

- 1 Ding-Wei Ye, Shusuan Jiang, Hong Luo, Fangjian Zhou et al. "Patient-reported outcomes (PROs) for rezvilutamide versus bicalutamide in combination with androgen-deprivation therapy (ADT) in high-volume, metastatic, hormone-sensitive prostate cancer (mHSPC): An analysis of the CHART randomized, open-label, phase 3 trial.", *Journal of Clinical Oncology*, 2024  
178 words — 3%  
Crossref

---
- 2 Kim N Chi, Andrew Protheroe, Alfredo Rodríguez-Antolín, Gaetano Facchini et al. "Patient-reported outcomes following abiraterone acetate plus prednisone added to androgen deprivation therapy in patients with newly diagnosed metastatic castration-naive prostate cancer (LATITUDE): an international, randomised phase 3 trial", *The Lancet Oncology*, 2018  
150 words — 3%  
Crossref

---
- 3 [www.thelancet.com](http://www.thelancet.com)  
Internet  
103 words — 2%

---
- 4 Xiaojie Bian, Weijie Gu, Xuepei Zhang, Liping Xie et al. "Correlation of PSA and survival in metastatic hormone-sensitive prostate cancer treated with rezvilutamide plus ADT in the CHART trial", *Med*, 2024  
100 words — 2%  
Crossref

---
- 5 [www.mdpi.com](http://www.mdpi.com)

Internet

60 words — 1%

6 [www.frontiersin.org](http://www.frontiersin.org)

Internet

54 words — 1%

7 [link.springer.com](http://link.springer.com)

Internet

47 words — 1%

8 [www-thelancet-com.utorpa.ntunhs.edu.tw](http://www-thelancet-com.utorpa.ntunhs.edu.tw)

Internet

39 words — 1%

9 [www.targetedonc.com](http://www.targetedonc.com)

Internet

38 words — 1%

10 Weijie Gu, Weiqing Han, Hong Luo, Fangjian Zhou et al. "Rezvilutamide versus bicalutamide in combination with androgen-deprivation therapy in patients with high-volume, metastatic, hormone-sensitive prostate cancer (CHART): a randomised, open-label, phase 3 trial", The Lancet Oncology, 2022

Crossref

32 words — 1%

11 Fred Saad, Antoine Thiery-Vuillemin, Pawel Wiechno, Boris Alekseev et al. "Patient-reported outcomes with olaparib plus abiraterone versus placebo plus abiraterone for metastatic castration-resistant prostate cancer: a randomised, double-blind, phase 2 trial", The Lancet Oncology, 2022

Crossref

29 words — 1%

12 [cdr.lib.unc.edu](http://cdr.lib.unc.edu)

Internet

26 words — < 1%

13 Ethan Basch, Karen Autio, Charles J Ryan, Peter Mulders et al. "Abiraterone acetate plus prednisone versus prednisone alone in chemotherapy-naive

23 words — < 1%

men with metastatic castration-resistant prostate cancer: patient-reported outcome results of a randomised phase 3 trial", *The Lancet Oncology*, 2013

Crossref

- 
- 14 [www.nejm.org](http://www.nejm.org) 22 words — < 1%  
Internet
- 
- 15 D. Ye, S. Wang, Z. Wang, N. Xing et al. "1649P Impact of concomitant medications on safety in patients with high-volume metastatic hormone-sensitive prostate cancer (mHSPC) receiving rezvilutamide (Rez) plus androgen-deprivation therapy (ADT): A post-hoc analysis of the randomized phase III CHART trial", *Annals of Oncology*, 2024 21 words — < 1%  
Crossref
- 
- 16 [mdedge.ma1.medscape.com](http://mdedge.ma1.medscape.com) 19 words — < 1%  
Internet
- 
- 17 Binghe Xu, Min Yan, Fei Ma, Xichun Hu et al. "Pyrotinib plus capecitabine versus lapatinib plus capecitabine for the treatment of HER2-positive metastatic breast cancer (PHOEBE): a multicentre, open-label, randomised, controlled, phase 3 trial", *The Lancet Oncology*, 2021 17 words — < 1%  
Crossref
- 
- 18 D. Cella, C. Ivanescu, S. Holmstrom, C.N. Bui, J. Spalding, K. Fizazi. "Impact of enzalutamide on quality of life in men with metastatic castration-resistant prostate cancer after chemotherapy: additional analyses from the AFFIRM randomized clinical trial", *Annals of Oncology*, 2015 16 words — < 1%  
Crossref
- 
- 19 [aacrjournals.org](http://aacrjournals.org) 15 words — < 1%  
Internet



- 
- 20 [www.nature.com](http://www.nature.com) Internet 15 words — < 1%
- 
- 21 Joelle El-Amm, Rami Nassabein, Jeanny Aragon-Ching. "Impact of abiraterone on patient-related outcomes in metastatic castration-resistant prostate cancer: current perspectives", *Cancer Management and Research*, 2017 Crossref 13 words — < 1%
- 
- 22 [wiadlek.pl](http://wiadlek.pl) Internet 13 words — < 1%
- 
- 23 Managing Metastatic Prostate Cancer In Your Urological Oncology Practice, 2016. Crossref 12 words — < 1%
- 
- 24 Nussbaum, N, D J George, A P Abernethy, C M Dolan, N Oestreicher, S Flanders, and T B Dorff. "Patient experience in the treatment of metastatic castration-resistant prostate cancer: state of the science", *Prostate Cancer and Prostatic Diseases*, 2016. Crossref 12 words — < 1%
- 
- 25 Yi Xu, Wei Hu, Jian Li, Xin Jiang, Ping Shi, Kai Shen, Yu Shen, Lingyu Ma, Yu Cao. "Safety, pharmacokinetics, and pharmacodynamics of SHR7280, an oral gonadotropin-releasing hormone antagonist in healthy premenopausal women", *Frontiers in Pharmacology*, 2022 Crossref 11 words — < 1%
- 
- 26 [iris.unito.it](http://iris.unito.it) Internet 11 words — < 1%
- 
- 27 [assets.researchsquare.com](https://assets.researchsquare.com) Internet 10 words — < 1%

- 
- 28 [trepo.tuni.fi](http://trepo.tuni.fi)  
Internet 10 words — < 1%
- 
- 29 "Management of Advanced Prostate Cancer",  
Springer Science and Business Media LLC, 2018  
Crossref 9 words — < 1%
- 
- 30 "Recent progress and controversies in the  
treatment of metastatic hormone-sensitive  
prostate cancer", Journal of Men's Health, 2024  
Crossref 9 words — < 1%
- 
- 31 [bmcmmedicine.biomedcentral.com](http://bmcmmedicine.biomedcentral.com)  
Internet 9 words — < 1%
- 
- 32 [flore.unifi.it](http://flore.unifi.it)  
Internet 9 words — < 1%
- 
- 33 [www.zora.uzh.ch](http://www.zora.uzh.ch)  
Internet 9 words — < 1%
- 
- 34 Jin-Ji Yang, Cheng Huang, Yun Fan, Hongming Pan  
et al. "Camrelizumab in different PD-L1 expression  
cohorts of pre-treated advanced or metastatic non-small cell  
lung cancer: a phase II study", Cancer Immunology,  
Immunotherapy, 2021  
Crossref 8 words — < 1%
- 
- 35 Pedro Barata, Umang Swami, Neeraj Agarwal.  
"The addition of apalutamide to ADT in the  
treatment of metastatic castration-sensitive prostate cancer:  
safety and efficacy", Expert Review of Anticancer Therapy, 2020  
Crossref 8 words — < 1%
- 
- 36 Stéphane Oudard, Boris Hadaschik, Fred Saad,  
David Cella et al. "Health-related Quality of Life at  
the SPARTAN Final Analysis of Apalutamide for Nonmetastatic

# Castration-resistant Prostate Cancer Patients Receiving Androgen Deprivation Therapy", European Urology Focus, 2021

Crossref

37 for the NCIC CTG PR.3/MRC UK PR07 investigators. "Combined androgen deprivation therapy and radiation therapy for locally advanced prostate cancer: a randomised, phase 3 trial", The Lancet, 20111217/20120106

8 words — < 1%

Crossref

38 [lirias.kuleuven.be](http://lirias.kuleuven.be)

Internet

8 words — < 1%

39 [pubmed.ncbi.nlm.nih.gov](http://pubmed.ncbi.nlm.nih.gov)

Internet

8 words — < 1%

40 [worldwidescience.org](http://worldwidescience.org)

Internet

8 words — < 1%

41 [www.onclive.com](http://www.onclive.com)

Internet

8 words — < 1%

42 Karim Fizazi, Gero Kramer, Jean-Christophe Eymard, Cora N Sternberg et al. "Quality of life in patients with metastatic prostate cancer following treatment with cabazitaxel versus abiraterone or enzalutamide (CARD): an analysis of a randomised, multicentre, open-label, phase 4 study", The Lancet Oncology, 2020

7 words — < 1%

Crossref

43 Marci J Clark, Nimanee Harris, Ingolf Griebisch, Dagmar Kaschinski, Catherine Copley-Merriman.

"Patient-reported outcome labeling claims and measurement approach for metastatic castration-resistant prostate cancer treatments in the United States and European Union", Health and Quality of Life Outcomes, 2014

7 words — < 1%

Crossref

44 Sumedha Chhatre, Alan J. Wein, S. Bruce Malkowicz, Ravishankar Jayadevappa. "Racial differences in well-being and cancer concerns in prostate cancer patients", Journal of Cancer Survivorship, 2011 7 words — < 1%

[Crossref](#)

45 Neeraj Agarwal, Kelly McQuarrie, Anders Bjartell, Simon Chowdhury et al. "Health-related quality of life after apalutamide treatment in patients with metastatic castration-sensitive prostate cancer (TITAN): a randomised, placebo-controlled, phase 3 study", The Lancet Oncology, 2019 6 words — < 1%

[Crossref](#)

46 Yutong Lu, Jingqi Jiang, Gaoyang Yang, Hui Ding et al. "Comparative effectiveness of multiple androgen receptor signaling inhibitor medicines with androgen deprivation therapy for metastatic hormone-sensitive prostate cancer: a study in the real world", Frontiers in Oncology, 2024 6 words — < 1%

[Crossref](#)

EXCLUDE QUOTES OFF

EXCLUDE BIBLIOGRAPHY ON

EXCLUDE SOURCES OFF

EXCLUDE MATCHES OFF
